# Supplementary material
Source: PubMed Central journal article supplement (PMC4280610)
Supplement: pnas.201407361SI.pdf [file pnas.201407361SI.pdf]

# Supporting Information

Ivanov et al. 10.1073/pnas.1407361111

## SI Materials and Methods

**Cell Transfections.** Before transfection, RNA/DNA complexes were preincubated in serum-free medium (Opti-MEM medium; Invitrogen) for 20 min at room temperature. U2OS cells ( $1 \times 10^5$  per well) or NSC34 cells ( $1.5 \times 10^5$  per well) were plated in 24-well plates for 24 h and then transfected with 750 nM synthetic tiRNAs/tiDNAs using 2.5  $\mu$ L of Lipofectamine 2000 (Invitrogen). In cotransfection experiments (Fig. 3D), U2OS cells were transfected as described above, but equal amounts of competitor oligos were added (final oligo concentration of 1.5  $\mu$ M, 1:1 G4/competitor RNA), and cells were transfected using 5  $\mu$ L of Lipofectamine 2000. In the case of cotransfection of extended repeats [C9ORF72 (23 $\times$ ) and AACCCC (17 $\times$ )], 2  $\mu$ g and 2.7  $\mu$ g of in vitro-transcribed C9ORF72 (23 $\times$ ) or AACCCC (17 $\times$ ) RNAs were added to the indicated RNA oligos, respectively (to keep the total number of GGGGCC or AACCCC repeats in the transfection reaction comparable).

**NMM Fluorescence.** Fluorescence assays were performed in 30  $\mu$ L of 10 mM sodium phosphate buffer (pH 6.4), 100 mM KCl, 4 mM MgCl<sub>2</sub>, and 5  $\mu$ M NMM. The ODN concentration ranged from 0 to 50  $\mu$ M. All fluorescence experiments were performed using a FlexStation III (Molecular Devices) plate reader with excitation and emission wavelengths of 399 nm and 614 nm, respectively. Fluorescence measurements were repeated three times for each sample, and the intensities were averaged and corrected by running a buffer control without RNA before each series of experiments. Fluorescence intensities were normalized to the maximum intensity of the c-MYC G-quartet. Results shown are the average of three to five independent replicates. Error bars represent the SD between experiments.

**Reagents.** Goat polyclonal anti-eIF3b, goat polyclonal anti-eIF4A, rabbit polyclonal anti-eIF4G, mouse monoclonal anti-YB-1, mouse monoclonal anti-eIF4E, and mouse monoclonal anti-Vigilin antibodies were purchased from Santa Cruz Biotechnology. Mouse polyclonal anti-G3BP was purchased from Biomedical Biosciences. Anti-mouse, anti-goat, and anti-rabbit secondary antibodies conjugated with HRP were purchased from GE Healthcare. Cy2-, Cy3-, and Cy5-HRP-conjugated secondary antibodies were purchased from Jackson Immunoresearch Labs.

The 3'-end biotinylated oligos (control DNA/RNAs or tiRNA/tiDNAs) were obtained from Integrated DNA Technology. Streptavidin agarose precipitations were as described [Ivanov et al. (1)]. Recombinant YB-1 (a gift from Lev Ovchinnikov, Institute of Protein Research, Russian Academy of Sciences, Pushchino, Russia) and/or its GST-tagged derivatives were added to the biotinylated RNA/streptavidin bead complexes, incubated for 2 h at 4  $^{\circ}$ C with rotation, and washed three times with wash buffer [15 mM Tris-HCl (pH 7.2), 0.5 M NaCl, 1 mM EDTA, 0.1% Nonidet P-40]. Proteins were eluted using 60  $\mu$ L of 1 $\times$  SDS/PAGE loading buffer.

All non-sU-containing RNA and DNA ODNs used in this study were synthesized and purified by Integrated DNA Technology. DNA oligos are analogous to their RNA counterparts. The sU-containing RNA ODNs were synthesized and purified by Thermo Scientific. All ODNs are at least 95% homogeneous. Sequences are reported below.

## ODN Sequences.

### Nonbiotinylated oligos.

Control RNA1: 5'-UGA AGG GUU UUU UGU GUC UCU AUU UCC UUC-3' (Piwi-interacting RNA piR006650)

Control RNA2: 5'-Phospho-UGU GAG UCA CGU GAG GGC AGA AUC UGC UC-3' (piR58620)

Control RNA3: 5'-Phospho-GCA UUC ACU UGG AUA GUA AAU CCA AGC UGA A-3' (random)

5'-tiRNA<sup>Ala</sup>: 5'-Phospho-GGG GGU GUA GCU CAG UGG UAG AGC GCG UGC-3'

U4G: 5'-Phospho-UGG GGU GUA GCU CAG UGG UAG AGC GCG UGC-3'

UU3G: 5'-Phospho-UUG GGU GUA GCU CAG UGG UAG AGC GCG UGC-3'

5'-tiRNA<sup>Ala/Cys</sup>: 5'-Phospho-GGG GGU GUA GCU CAG UGG UAG AGC AUU UGA-3'

5'-tiRNA<sup>Cys/Ala</sup>-bio: 5'-Phospho-GGG GGU AUA GCU CAG UGG UAG AGC GCG UGC-3'

Helix-mis: 5'-Phospho-GGG GGU GUA GCU CAG UGG UAG UCC GCG UGC-3'

UU3G-helix-mis: 5'-Phospho-UUG GGU GUA GCU CAG UGG UAG UCC GCG UGC-3'

5'-tiRNA<sup>Cys</sup>: 5'-Phospho-GGG GGU AUA GCU CAG UGG UAG AGC AUU UGA-3'

5'-tiRNA<sup>Val</sup>: 5'-Phospho-GUU UCC GUA GUG UAG UGG UUA UCA CGU UCG CC-3'

5'-tiRNA<sup>Pro</sup>: 5'-Phospho-GGC UCG UUG GUC UAG GGG UAU GAU UCU CGG-3'

5'-tiRNA<sup>Met</sup>: 5'-Phospho-GCC UCG UUA GCG CAG UAG GUA ACG CGU CAG U-3'

C9ORF72 (4 $\times$ ): 5'-GGG GCC GGG GCC GGG GCC GGG GCC-3'

AS1411: 5'-GGT GGT GGT TGT GGT GGT GGT GG-3'

C-myc: 5'-GGG GAG GGT GGG GAG GGT GGG G-3'

AACCCC (4 $\times$ ): 5'-AAC CCC AAC CCC AAC CCC AAC CCC-3'

### Biotinylated oligos.

Control RNA1-bio: 5'-UGA AGG GUU UUU UGU GUC UCU AUU UCC UUC-3'-/biotin/

Control RNA2-bio: 5'-Phospho-UGU GAG UCA CGU GAG GGC AGA AUC UGC UC-3'-/biotin/

Control RNA3-bio: 5'-Phospho-GCA UUC ACU UGG AUA GUA AAU CCA AGC UGA A-3'-/biotin/

5'-tiRNA<sup>Ala</sup>-bio: 5'-Phospho-GGG GGU GUA GCU CAG UGG UAG AGC GCG UGC-3'-/biotin/

U4G-bio: 5'-Phospho-UGG GGU GUA GCU CAG UGG UAG AGC GCG UGC-3'-/biotin/

UU3G-bio: 5'-Phospho-UUG GGU GUA GCU CAG UGG UAG AGC GCG UGC-3'-/biotin/

24mer-bio: 5'-Phospho-GGG GGU GUA GCU CAG UGG UAG AGC-3'-/biotin/

5'-tiRNA<sup>Ala/Cys</sup>-bio: 5'-Phospho-GGG GGU GUA GCU CAG UGG UAG AGC AUU UGA-3'-/biotin/

5'-tiRNA<sup>Cys/Ala</sup>-bio: 5'-Phospho-GGG GGU AUA GCU CAG UGG UAG AGC GCG UGC-3'-/biotin/

Helix-mis-bio: 5'-Phospho-GGG GGU GUA GCU CAG UGG UAG UCC GCG UGC-3'-/biotin/

UU3G-helix-mis-bio: 5'-Phospho-UUG GGU GUA GCU CAG UGG UAG UCC GCG UGC-3'-/biotin/

AS1411-bio: 5'-GGT GGT GGT TGT GGT GGT GGT GG-3'-/biotin/

C-myc-bio: 5'-GGG GAG GGT GGG GAG GGT GGG G-3'-/biotin/

M3Q: 5'-GAG GGA GGG AGG GAG AGG GA-3'-/biotin/

M3Q-Mut: 5'-GAG ATA GTG AGT GAG AGA GA-3'-/biotin/

**sU-containing RNA oligos.**

5'-Ala-sU RNA: 5'-Phospho-GGG GG 4-S-U GUA GCU CAG 4-S-UGG UAG AGC GCG UGC-3'-/biotin/

5'-Met-sU RNA: 5'-Phospho-GCC UCG 4-S-U UA GCG CAG 4-S-U AG GUA GCG CGU CAG U-3'-/biotin/

Control-sU RNA: 5'-Phospho-GGC UCG U 4-S-U G GUC UAG GGG 4-S-U AU GAU UCU CGG-3'-/biotin/

1. Ivanov P, Emara MM, Villen J, Gygi SP, Anderson P (2011) Angiogenin-induced tRNA fragments inhibit translation initiation. *Mol Cell* 43(4):613-623.

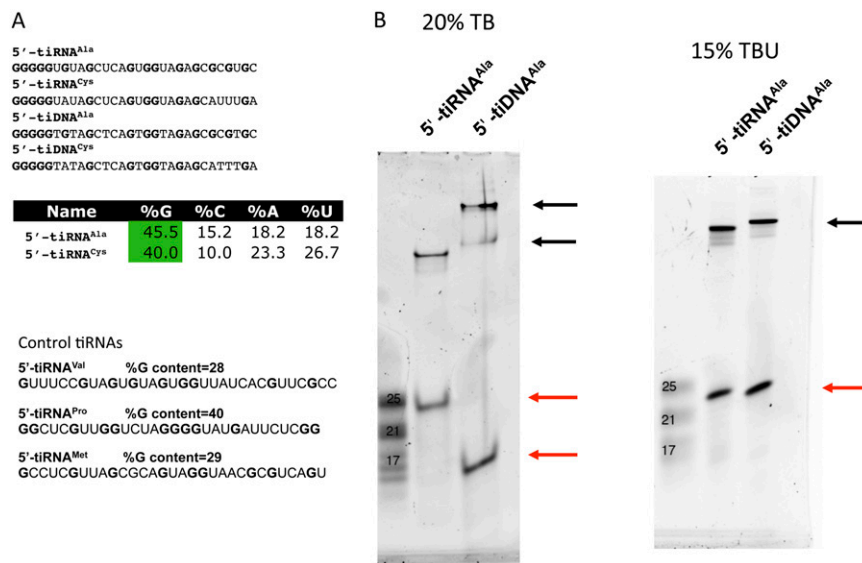

**Fig. S1.** G-rich 5'-tiRNA<sup>Ala</sup> and 5'-tiRNA<sup>Cys</sup> assemble polymorphic structures. (A) Translationally active 5'-tiRNA<sup>Ala</sup> and 5'-tiRNA<sup>Cys</sup> are highly G-rich in composition. (Upper) Sequences of 5'-tiRNA<sup>Ala</sup>, 5'-tiRNA<sup>Cys</sup>, and their DNA analogs. Guanine is shown in bold black. (Lower) Nucleotide content of 5'-tiRNA<sup>Ala</sup> and 5'-tiRNA<sup>Cys</sup> is highlighted. Sequence and Guanine content of other tiRNAs used in this study are shown. (B) Translationally active 5'-tiRNA<sup>Ala</sup> assembles monomeric and multimeric structures. 5'-tiR/DNA<sup>Ala</sup> forms compact and multimeric structures. PAGE analysis in denatured (15% TBU, Right) and native (20% TB, Left) conditions reveals stable, fast-migrating RNA/DNA species with compact shapes (25 nt and 17 nt, respectively; red arrows), as well as stable oligomers/multimers migrating slowly and resistant to denaturation (black arrows).

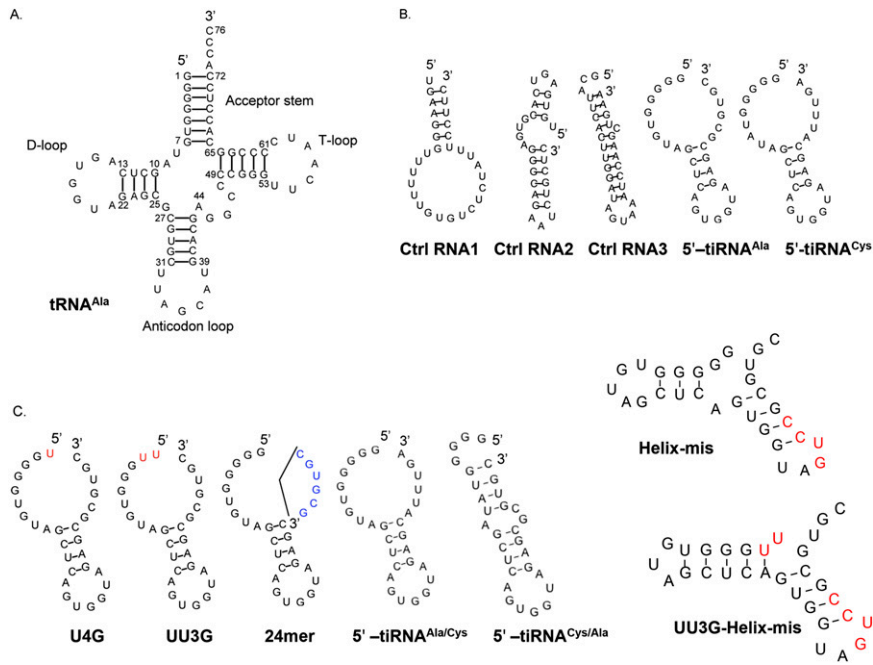

**Fig. S2.** Predicted secondary structures of selected 5'-tiRNAs and their mutants. (A) Secondary structure of tRNA<sup>Ala</sup>. (B) Predicted secondary structures of control (Ctrl) RNAs and 5'-tiRNA<sup>Ala</sup> and 5'-tiRNA<sup>Cys</sup>. (C) Mutants of 5'-tiRNA<sup>Ala</sup> and 5'-tiRNA<sup>Cys</sup>. Substituted nucleotides are shown in red, and deleted nucleotides are shown within wedges in blue. Prediction of secondary structures was done online at the RNAFold WebServer (<http://rna.tbi.univie.ac.at/cgi-bin/RNAfold.cgi>).
